# Supplementary material for: Quality and Safety in Healthcare for Medical Students: Challenges and the Road Ahead
Source: Healthcare (Basel). 2020 Dec 4;8(4):540. doi: 10.3390/healthcare8040540 (PMC7768411; doi:10.3390/healthcare8040540)
Supplement: Supplementary file 1 [file healthcare-08-00540-s001.xlsx]

## Sheet: Likert 3
		Table 1. Overview student`s perceptions regarding cause of error and management
		Cause of Errors
		Sentence	Group	Agree	Neutral	Disagree	P-value
		Making errors in medicine is inevitable	Female	66 (72.57) [0.60]	26 (21.53) [0.93]	39 (36.90) [0.12]	0.11813
			Male	52 (45.43) [0.95]	9 (13.47) [1.49]	21 (23.10) [0.19]
		There is a gap between what is known as “best care” and what is being provided on a day-to-day basis	Female	102 (103.32) [0.02]	12 (12.92) [0.06]	17 (14.76) [0.34]	0.578341
			Male	66 (64.68) [0.03]	9 (8.08) [0.10]	7 (9.24) [0.54]
		Competent health practitioners do not make medical errors that lead to patient harm	Female	28 (29.52) [0.08]	26 (25.22) [0.02]	77 (76.26) [0.01]	0.867005
			Male	20 (18.48) [0.13]	15 (15.78) [0.04]	47 (47.74) [0.01]
		Most errors are due to things that health practitioners cannot do anything about	Female	8 (11.07) [0.85]	30 (32.60) [0.21]	93 (87.33) [0.37]	0.1569
			Male	10 (6.93) [1.36]	23 (20.40) [0.33]	49 (54.67) [0.59]
		Error Management
		Sentence	Students	Agree	Neutral	Disagree	P-value
		Only physicians can determine the causes of a medical error	Female	32 (35.67) [0.38]	28 (25.22) [0.31]	71 (70.11) [0.01]	0.404718
			Male	26 (22.33) [0.60]	13 (15.78) [0.49]	43 (43.89) [0.02]
		If there is no harm to a patient, there is no need to address an error	Female	15 (14.21) [0.04]	14 (11.74) [0.43]	102 (105.05) [0.09]	0.47624
			Male	8 (8.79) [0.07]	5 (7.26) [0.70]	68 (64.95) [0.14]
		Reporting systems do little to reduce future errors	Female	36 (36.90) [0.02]	28 (24.60) [0.47]	67 (69.50) [0.09]	0.469945
			Male	24 (23.10) [0.04]	12 (15.40) [0.75]	46 (43.50) [0.14]
		After an error occurs, an effective strategy is to work harder and to be more careful	Female	126 (123.62) [0.05]	3 (2.46) [0.12]	2 (4.92) [1.73]	0.85058
			Male	75 (77.38) [0.07]	1 (1.54) [0.19]	6 (3.08) [2.77]
		Health practitioners should not tolerate uncertainty in patient care	Female	60 (59.66) [0.00]	30 (27.06) [0.32]	41 (44.28) [0.24]	0.480475
			Male	37 (37.34) [0.00]	14 (16.94) [0.51]	31 (27.72) [0.39]
		The culture of medicine makes it easy for providers to deal constructively with errors	Female	89 (87.95) [0.01]	19 (17.84) [0.08]	23 (25.22) [0.19]	0.692138
			Male	54 (55.05) [0.02]	10 (11.16) [0.12]	18 (15.78) [0.31]
		Table 2. Pre-Test and Post-test answers
		Cause of Errors
		Sentence	Test	Agree	Neutral	Disagree	P-value
		Making errors in medicine is inevitable	Before	60 (62.00) [0.06]	28 (23.50) [0.86]	19 (21.50) [0.29]	0.296142
			After	64 (62.00) [0.06]	19 (23.50) [0.86]	24 (21.50) [0.29]
		There is a gap between what is known as “best care” and what is being provided on a day-to-day basis	Before	94 (92.00) [0.04]	9 (9.50) [0.03]	4 (5.50) [0.41]	0.619474
			After	90 (92.00) [0.04]	10 (9.50) [0.03]	7 (5.50) [0.41]
		Competent health practitioners do not make medical errors that lead to patient harm	Before	28 (28.50) [0.01]	30 (25.50) [0.79]	49 (53.00) [0.30]	0.331285
			After	29 (28.50) [0.01]	21 (25.50) [0.79]	57 (53.00) [0.30]
		Most errors are due to things that health practitioners cannot do anything about	Before	9 (11.00) [0.36]	20 (30.50) [3.61]	78 (65.50) [2.39]	*0,002
			After	13 (11.00) [0.36]	41 (30.50) [3.61]	53 (65.50) [2.39]
		Sentence	Students	Agree	Neutral	Disagree	P-value
		Only physicians can determine the causes of a medical error	Before	28 (28.50) [0.01]	30 (25.50) [0.79]	49 (53.00) [0.30]	0.331285
			After	29 (28.50) [0.01]	21 (25.50) [0.79]	57 (53.00) [0.30]
		If there is no harm to a patient, there is no need to address an error	Before	15 (15.50) [0.02]	6 (8.00) [0.50]	86 (83.50) [0.07]	0.553785
			After	16 (15.50) [0.02]	10 (8.00) [0.50]	81 (83.50) [0.07]
		Reporting systems do little to reduce future errors	Before	22 (31.50) [2.87]	10 (19.00) [4.26]	75 (56.50) [6.06]	*0,00001
			After	41 (31.50) [2.87]	28 (19.00) [4.26]	38 (56.50) [6.06]
		After an error occurs, an effective strategy is to work harder and to be more careful	Before	100 (102.50) [0.06]	3 (2.00) [0.50]	4 (2.50) [0.90]	0.23201
			After	105 (102.50) [0.06]	1 (2.00) [0.50]	1 (2.50) [0.90]
		Health practitioners should not tolerate uncertainty in patient care	Before	58 (58.00) [0.00]	27 (28.00) [0.04]	22 (21.00) [0.05]	0.920044
			After	58 (58.00) [0.00]	29 (28.00) [0.04]	20 (21.00) [0.05]
		The culture of medicine makes it easy for providers to deal constructively with errors	Before	67 (69.25) [0.07]	17 (17.97) [0.05]	36 (32.78) [0.32]	0.624941
			After	64 (61.75) [0.08]	17 (16.03) [0.06]	26 (29.22) [0.36]
		Table 3. Student`s Responses to Teaching Items of Patient Safety Education and Skills
		Teaching Items of Patient Safety Education and Skills
		Sentence	Students	Agree	Neutral	Disagree	P-Value
		Physicians should routinely spend part of their professional time working to improve patient care	Female	30 (31.38) [0.06]	3 (3.20) [0.01]	40 (38.42) [0.06]	0.825372
			Male	19 (17.62) [0.11]	2 (1.80) [0.02]	20 (21.58) [0.12]
		Patient safety’ is an important topic	Female	73	0	0	NA
			Male	41	0	0
		Physicians should routinely report medical errors	Female	32 (30.74) [0.05]	2 (1.92) [0.00]	39 (40.34) [0.04]	0.870444
			Male	16 (17.26) [0.09]	1 (1.08) [0.01]	24 (22.66) [0.08]
		Learning how to improve patient safety is an appropriate use of time in medical school	Female	35 (39.06) [0.42]	3 (3.84) [0.18]	35 (30.10) [0.80]	0.141656
			Male	26 (21.94) [0.75]	3 (2.16) [0.33]	12 (16.90) [1.42]
		Would like to receive further teaching on patient safety	Female	43 (42.26) [0.01]	20 (18.57) [0.11]	10 (12.17) [0.39]	0.492958
			Male	23 (23.74) [0.02]	9 (10.43) [0.20]	9 (6.83) [0.69]
		Supporting and advising a peer who must decide how to respond to an error	Female	43 (42.26) [0.01]	20 (18.57) [0.11]	10 (12.17) [0.39]	0.492958
			Male	23 (23.74) [0.02]	9 (10.43) [0.20]	9 (6.83) [0.69]
		Analyzing a case to ﬁnd the cause of an error	Female	43 (40.98) [0.10]	20 (19.85) [0.00]	10 (12.17) [0.39]	0.508618
			Male	21 (23.02) [0.18]	11 (11.15) [0.00]	9 (6.83) [0.69]
		Disclosing an error to a faculty member	Female	37 (38.42) [0.05]	3 (3.20) [0.01]	33 (31.38) [0.08]	0.812671
			Male	23 (21.58) [0.09]	2 (1.80) [0.02]	16 (17.62) [0.15]

## Sheet: Tables 1-3
Causes of Errors
Sentence	Group	Strongly agree	Agree	Neutral	Disagree	Strongly disagree	P-value
Making errors in medicine is inevitable.	Female	31	35	26	34	5
	Male	28	24	9	13	8	0.04
There is a gap between what is known as “best care” and what is being provided on a day-to-day basis	Female	37	65	12	16	1
	Male	26	40	9	5	2	0.49
Competent health practitioners do not make medical errors that lead to patient harm		6	22	26	68	9
	Female						0.43
	Male	6	14	15	36	11
Most errors are due to things that health practitioners cannot do anything about	Female	1	7	30	73	20
	Male	2	8	23	37	12	0.37
Error Management
Sentence	Students	Strongly agree	Agree	Neutral	Disagree	Strongly disagree	P-value
Only physicians can determine the causes of a medical error	Female	9	23	28	57	14	0.57
	Male	8	18	13	31	12
If there is no harm to a patient, there is no need to address an error	Female	2	13	14	61	41	0.72
	Male	2	7	5	44	24
Reporting systems do little to reduce future errors	Female	12	24	28	51	16	0.10
	Male	2	22	12	31	15
After an error occurs, an effective strategy is to work harder and to be more careful	Female	80	46	3	2	0	0.22
	Male	45	30	1	5	1
health practitioners should not tolerate uncertainty in patient care	Female	9	51	30	35	6	0.21
	Male	12	25	14	25	6
The culture of medicine makes it easy for providers to deal constructively with errors	Female	22	67	19	19	4	0.51
	Male	20	34	10	15	3
Causes of Errors
Sentence	Test	Strongly agree	Agree	Neutral	Disagree	Strongly disagree	P-value
Making errors in medicine is inevitable.	Before	21	39	28	13	6	0.54
	After	30	34	19	21	3
There is a gap between what is known as “best care” and what is being provided on a day-to-day basis	Before	31	63	9	4	0	0.52
	After	34	56	10	6	1
Competent health practitioners do not make medical errors that lead to patient harm	Before	6	22	30	39	10	0.97
	After	6	23	21	51	6
Most errors are due to things that health practitioners cannot do anything about	Before	1	8	20	65	13	0.004
	After	3	10	41	45	8
Error Management
Sentence	Students	Strongly agree	Agree	Neutral	Disagree	Strongly disagree	P-value
Only physicians can determine the causes of a medical error	Before	6	22	30	39	10	0.47
	After	6	23	21	51	6
If there is no harm to a patient, there is no need to address an error	Before	5	10	6	52	34	0.52
	After	3	13	10	51	30
Reporting systems do little to reduce future errors	Before	5	17	10	56	19	0.000034
	After	10	31	28	31	7
After an error occurs, an effective strategy is to work harder and to be more careful	Before	60	40	3	4	0	0.13
	After	66	39	1	0	1
health practitioners should not tolerate uncertainty in patient care	Before	17	41	27	15	7	0.70
	After	13	45	29	18	2
The culture of medicine makes it easy for providers to deal constructively with errors	Before	13	54	17	23	13	0.55
	After	16	48	17	20	6
Teaching Items of Patient Safety
Education and Skills
Sentence	Students	Strongly agree	Agree	Neutral	Disagree	Strongly disagree	P-value
Physicians should routinely spend part of their professional time working to improve patient care	Female	29	1	3	40	0	0.84
	Male	19	0	2	20	0
Patient safety’ is an important topic	Female	8	65	0	0	0	0.38
	Male	6	35	0	0	0
Physicians should routinely report medical errors	Female	31	1	2	39	0	0.11
	Male	14	2	1	24	0
Learning how to improve patient safety is an appropriate use of time in medical school	Female	32	3	3	34	1	0.60
	Male	25	1	3	12	0
Would like to receive further teaching on patient safety	Female	34	6	20	9	1	0.26
	Male	22	1	9	9	0
Supporting and advising a peer who must decide how to respond to an error	Female	37	6	20	9	1	0.45
	Male	22	1	9	9	0
Analyzing a case to ﬁnd the cause of an error	Female	37	6	20	10	0	0.46
	Male	20	1	11	9	0
Disclosing an error to a faculty member	Female	36	1	3	33	0	0.84
	Male	23	0	2	16	0

## Sheet: Table 4
Question	Most plausible answer (percentage)	Other answers
		(percentage)
According to the dimensions of the quality of the IOM, which would be awarded the first place in importance at this moment (pandemic) to avoid the collapse of the health system?	Efficiency (39.1%)	Safety (0.45%), effectiveness (32.2), timeliness, (6.1%), patient-centered (21.7%), and equitable (0.45%).
According to the Avedis Donabedian model of quality, the lack of mechanical ventilators to fulfill the needs of the current pandemic corresponds to…	Infrastructure-equipment (95.5%)	Process-environment (2.6%) Process-management (0.9%)
In which of the elements of the Avedis Donabedian quality model do you think Mexico is worst?	Structure (53.9%)	Process 27.8%
		Results 18.3%
In which of the elements of the Avedis Donabedian quality model do you think Mexico is best?		Structure (26%)
	Process (47%)	Results (27%)
If a patient enters the emergency room for acute abdominal pain and derived from the current health contingency, acquires COVID-19 infection in the hospital and dies of respiratory complications, what type of event would be?	Sentinel (72.2%)	Adverse event (25.2%)
		Near miss (2.6%)
